# Supplementary material for: Microfluidics-aided fabrication of 3D micro-nano hierarchical SERS substrate for rapid detection of dual hepatocellular carcinoma biomarkers
Source: Royal Society of Chemistry journal article supplement (doi:10.1039/d3lc00907f), 2023-12-12
Supplement: d3lc00907f1.pdf [file d3lc00907f1.pdf]

*Supplementary Material*

**Microfluidics aided fabrication of 3D micro-nano  
hierarchical SERS substrate for rapid detection of dual  
hepatocellular carcinoma biomarkers**

Changbiao Zhan, Zihao Guan, Liandong Yu,\* Tongmei Jing, Huakun Jia,  
Xiaozhe Chen, Rongke Gao\*

*College of Control Science and Engineering, China University of Petroleum (East  
China), Qingdao 266580, China.*

**\* Address for correspondence:**

**Rongke Gao**

Telephone: +86-13023091659; E-mail addresses: rkgao@upc.edu.cn

**Liandong Yu**

E-mail addresses: liandongyu@upc.edu.cn

## 1. Experimental details

### 1.1 The details of calculating enhancement factor (EF)

According to the previous paper,  $10^{-6}$  M MGITC solution was added to the optimized SERS substrate and slide glass. After natural air-drying procedure, we performed Raman detection to obtain normal Raman spectra and SERS spectra displayed in [Figure S6d](#).  $N_{SERS}$  is the number of MGITC molecules covering the SERS substrate under the laser spot, and  $N_{bulk}$  refers to the number of MGITC molecules excited by the laser on the slide glass ([Figure S11](#)).  $S_{MGITC}$  was around  $10^4$  nm<sup>2</sup>. Thus, the  $N_{SERS}$  was calculated to be  $2.25 \times 10^2$  following the equation (1).  $N_{bulk}$  was calculated through the equation (2).  $A$  was Avogadro constant ( $6 \times 10^{23}$ ),  $h$  was the laser penetration depth (3.48  $\mu$ m),  $S$  was the area of laser spot ( $\sim 2.25$   $\mu$ m<sup>2</sup>),  $\rho_{MGITC}$  was the density of MGITC (1.31 g/cm<sup>3</sup>),  $M_{MGITC}$  was molar mass of MGITC (485.98 g/mol).  $I_{SERS}$  and  $I_{bulk}$  were extracted from the spectra in [Figure S6d](#). EF was calculated to be  $1.5 \times 10^8$  through the equation (3)

$$N_{SERS} = \frac{S_{laser}}{S_{MGITC}} \#(1)$$

$$N_{bulk} = \frac{A \times (S \times h \times \rho_{MGITC})}{M_{MGITC}} \#(2)$$

$$EF = \frac{I_{SERS}}{I_{bulk}} \times \frac{N_{bulk}}{N_{SERS}} \#(3)$$

## 1.2. Materials

Hexadecane, Poly (ethylene glycol) diacrylate (PEGDA, Mn 700), Gold (III) chloride trihydrate ( $\text{HAuCl}_4 \cdot 3\text{H}_2\text{O}$ , >99.9%), sodium citrate dehydrate (99%), bovine serum albumin (BSA), Span 80 nonionic surfactant, Malachite green isothiocyanate (MGITC) and 3,3'-diethylthiadicarbocyanine iodide (DTDC), alpha-L-Fucosidase (AFU) and monoclonal antibody (McAb) to AFU were purchased from Sigma-Aldrich. Human Alpha fetoprotein (AFP), human AFP monoclonal antibody (Ab1), Mouse anti human AFP monoclonal antibody (Ab2) were obtained from Shanghai Linc-Bio Science Co, Ltd. (Shanghai, China). Photoinitiator (Omnirad 2959) was purchased from Thunder Chemical Shanghai, Ltd. Phosphate-buffered saline (PBS) solutions were obtained from Sangon Biotech (Shanghai, China).

### **1.3. Preparation of AFP/AFU detection antibody-conjugated AuNPs**

The preparation of functionalized AuNPs has been reported in our previous work.<sup>1</sup> In brief, DTDC solution was dropped in 1 mL of a 0.1 nM AuNPs solution and placed in a vortex shaker for 30 min. Then, 100  $\mu$ L of 0.1 M boric acid buffer and add 2  $\mu$ L of 0.1 mg mL<sup>-1</sup> AFP detection antibody were serially added into the mixture for 2 h reaction with stirring. 20  $\mu$ L of 10% (m/m) BSA was employed to deactivate unreacted sites on the surface of the AuNPs for 30 minutes. The antibody-conjugated AuNPs were stored in 4°C refrigerator to stabilize for 1 hour. Finally, the non-specific binders were washed three times with deionized water. The modification process of AFU detection antibody was the same as that of AFP (Figure S5a).

#### **1.4. Instruments**

The excitation source of Raman microscope system was a He-Ne laser with a power of 5 mW and an operating wavelength of 632.8 nm. The laser spot size after 30% ND filtering is close to 1.5  $\mu\text{m}$  with a 50 $\times$  objective (0.5 NA). The accumulation number and exposure time for each point were 3 and 10 s. A 60  $\mu\text{m}$  (x-axis) by 60  $\mu\text{m}$  (y-axis) range under computer control yielded rectangular Raman mapping images with 400 pixels (1 pixel  $\approx$  3  $\mu\text{m}$   $\times$  3  $\mu\text{m}$ ). The accumulation number and exposure time for each pixel were 1 and 1 s, respectively. The absorption spectra were obtained with Cary 5000 UV–vis-NIR spectrophotometer (Agilent Technologies, Inc., USA) with an integrating sphere detector unit. In order to control the experimental variables, the samples were dropped on a PET film with a side length of 2 cm, and then covered with another clean PET film of the same size. Scanning electron microscope (SEM) images of the substrate was carried out through a Hitachi-SU8020 (Hitachi, Japan). All samples can be dried at room temperature.

### 1.5. The amount of capture antibodies per SAHM

Regarding the number of antibodies (Abs) per microparticle, it is determined by mass difference between the antibodies added to a suspension of SAHMs and the unbound antibodies remaining in the supernatant when separated from the formed Abs–SAHMs conjugates.<sup>2</sup> The peptide bonds of proteins have strong UV absorption at 200-250 nm. In order to evaluate the amount of functional capture antibodies per SAHMs, we quantified the change of antibody concentration in solution before and after antibody modification by measuring the absorbance at 200-250 nm as shown in **Figure S10**. The formula of Lambert-Beer law was as follow:

$$A = \epsilon bc$$

A is the absorbance,  $\epsilon$  is the molar absorption coefficient, c is optical path length. The number of SAHMs used to modify antibodies is approximately 7000 mL<sup>-1</sup>. Thus, the amount of functional capture antibody per SAHM was calculated to be approximately 0.91 ng.

## 2. Figures

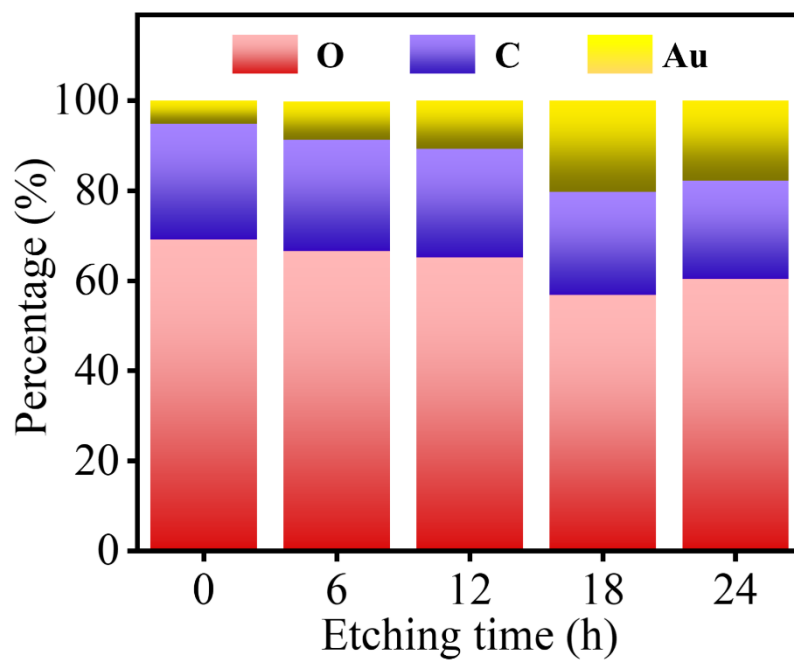

**Figure S1.** The amount of Au loading on SAHMs varied as a function of the etching time.

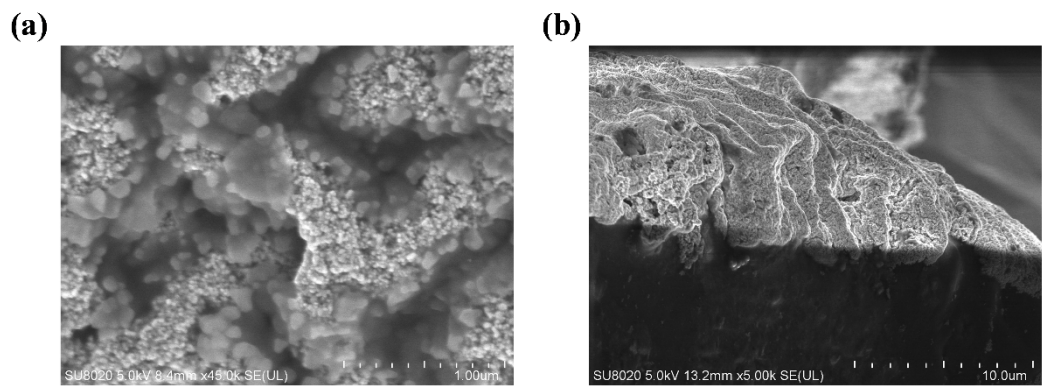

**Figure S2.** The top view (a) and side view (b) of the wrinkle structures.



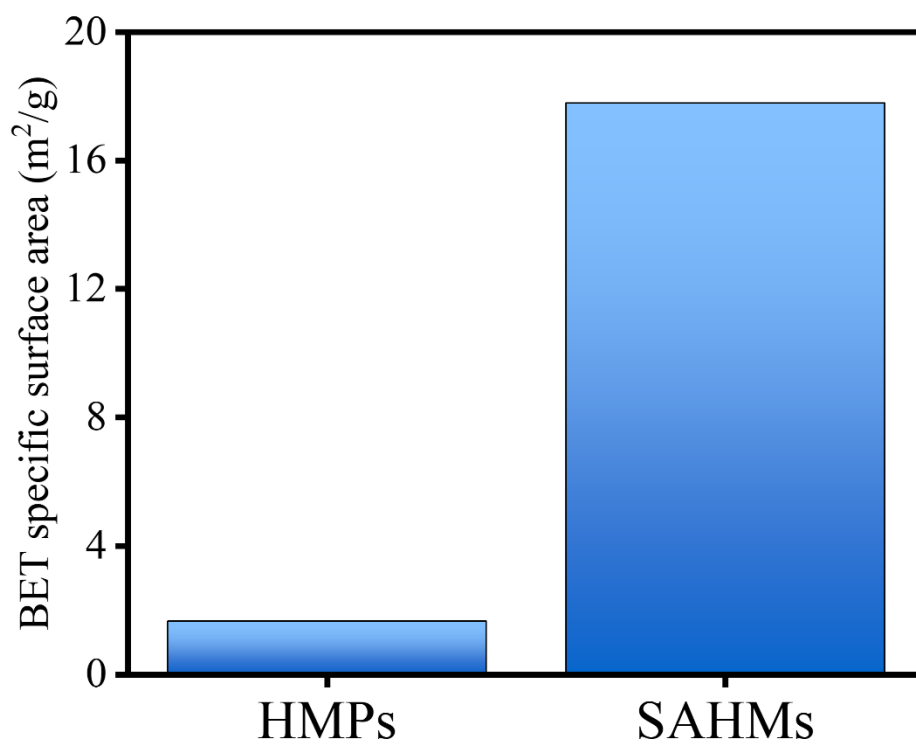

**Figure S3.** The BET specific surface area of HMPs and SAHMs.

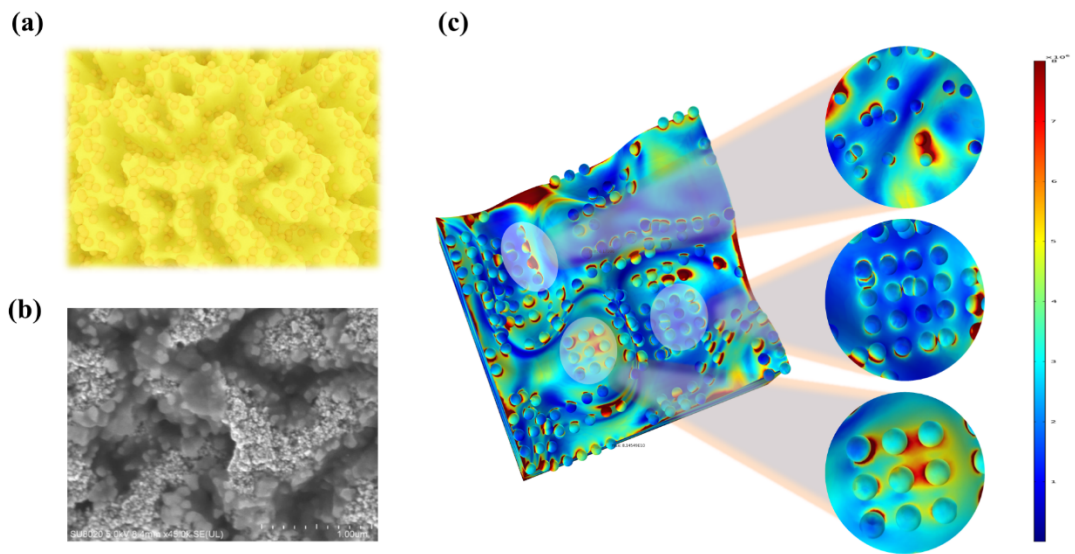

**Figure S4.** (a-b) Schematic and SEM image of the SAHMs. (c) COMSOL simulation of the electric field distribution on the SAHMs.

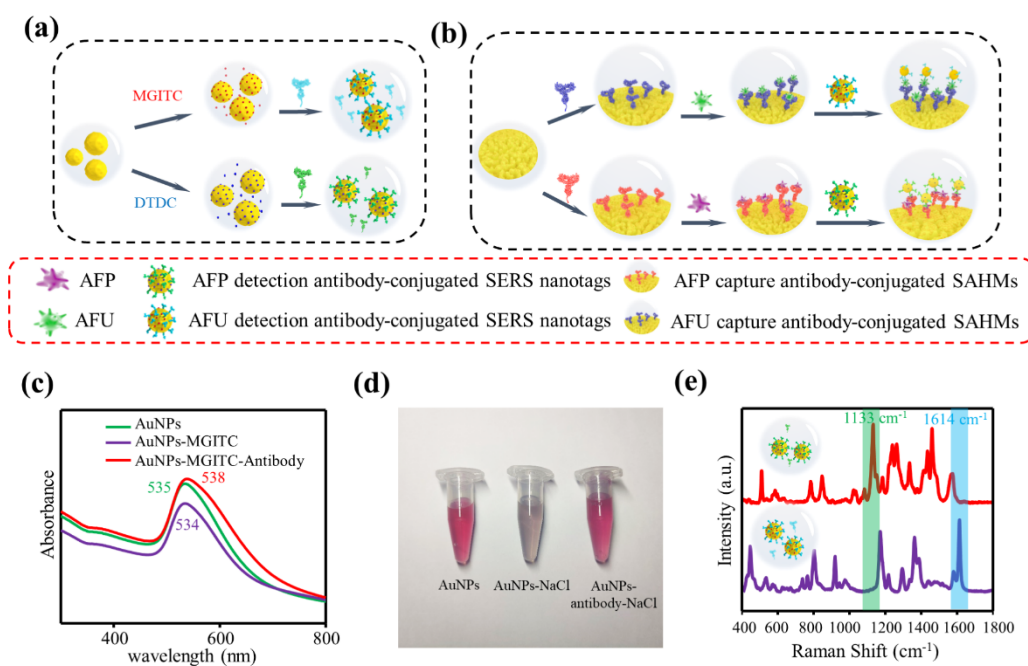

**Figure S5.** (a) Sequential process for preparing two different types of antibody-conjugated SERS nanotags. (b) Preparation steps of “sandwich” immunocomplexes on SAHMs. (c) The UV-vis absorption spectra for AuNPs and SERS nanotags with detection antibodies. (d) The photograph of salt aging experiments. (e) SERS spectra of two individual nanotags (DTDC and MGITC).

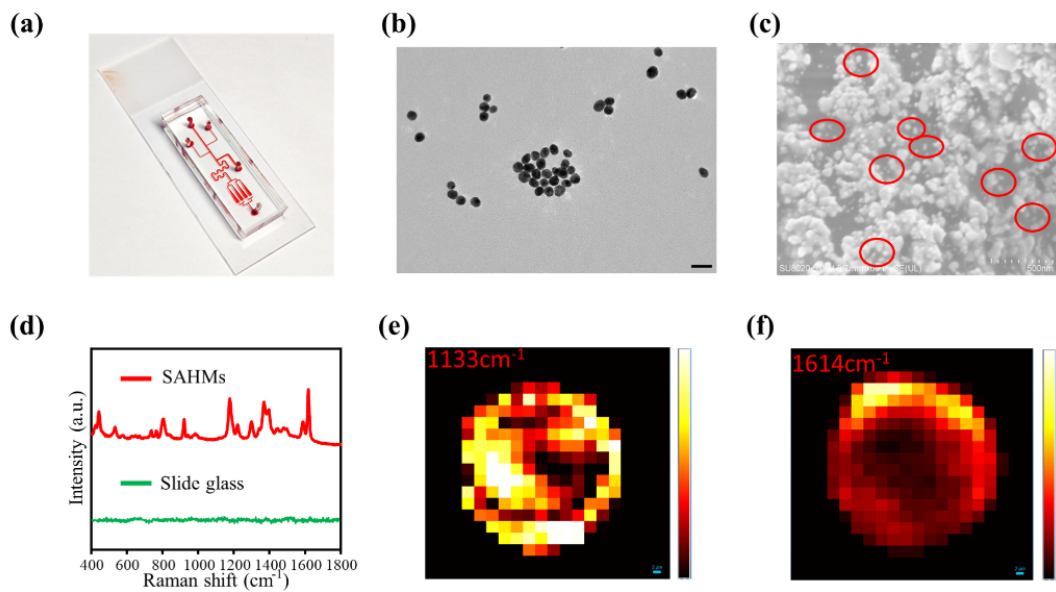

**Figure S6.** (a) The photograph of the microfluidic chip for SERS detection containing red ink. (b) The representative TEM image of AuNPs. The scale bar is 100 nm. (c) SEM image of the SERS nanotags distributed on the SAHMs by immunocomplexes. (d) The SERS spectrum of  $10^{-6}$  M MGITC on the SAHMs and its normal Raman spectrum on slide glass. (e-f) SERS mapping images of immunocomplexes obtained from the SAHMs with  $50 \text{ ng mL}^{-1}$  of AFP and AFU. The scale bar is  $2 \mu\text{m}$ .

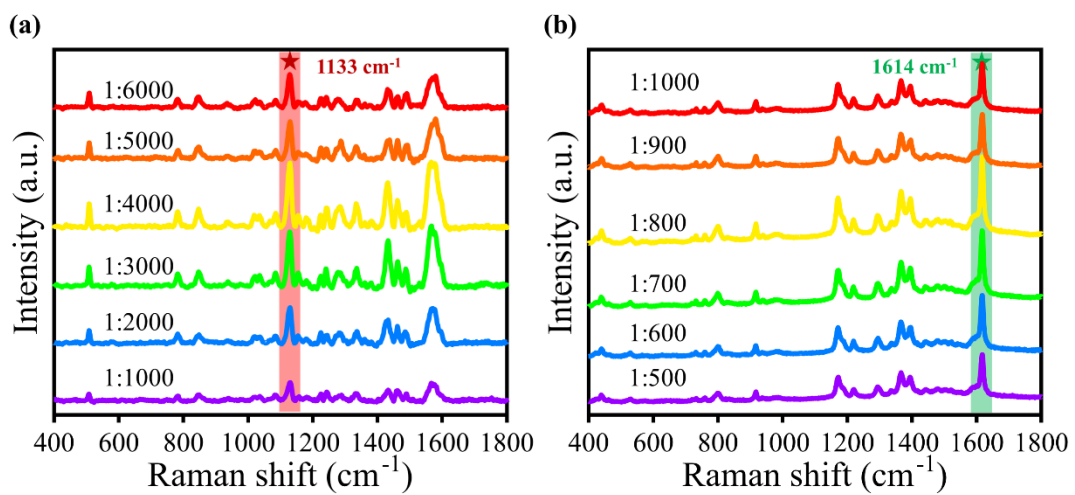

**Figure S7.** SERS spectra of the nanotags with different ratios of AuNPs to reporter molecules DTDC (a) and MGITC (b).

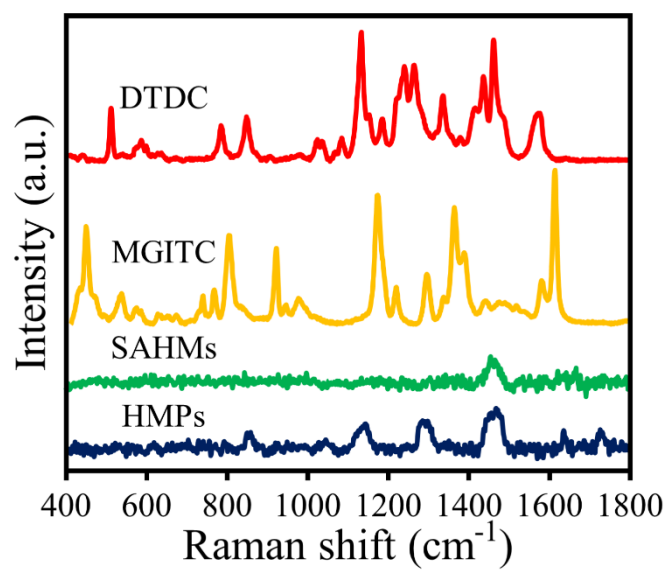

**Figure S8.** Raman spectra of the HMPs, SAHMs, MGITC, and DTDC.

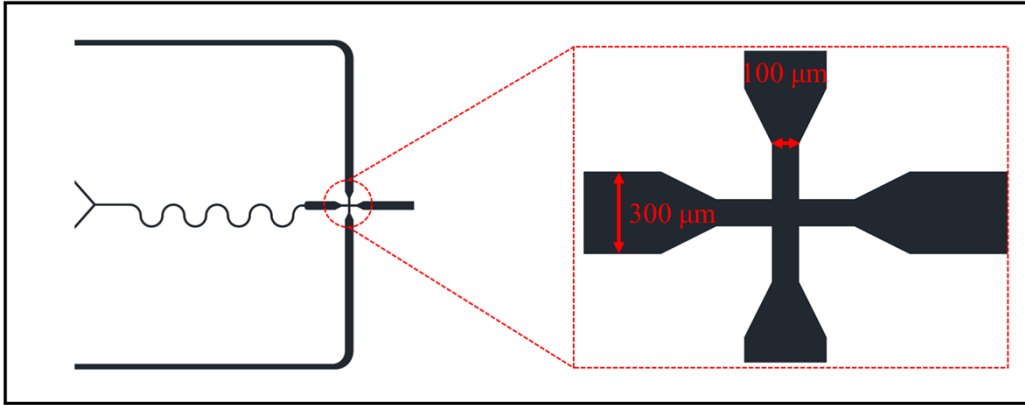

**Figure S9.** The CAD design of the microdroplet generation unit.

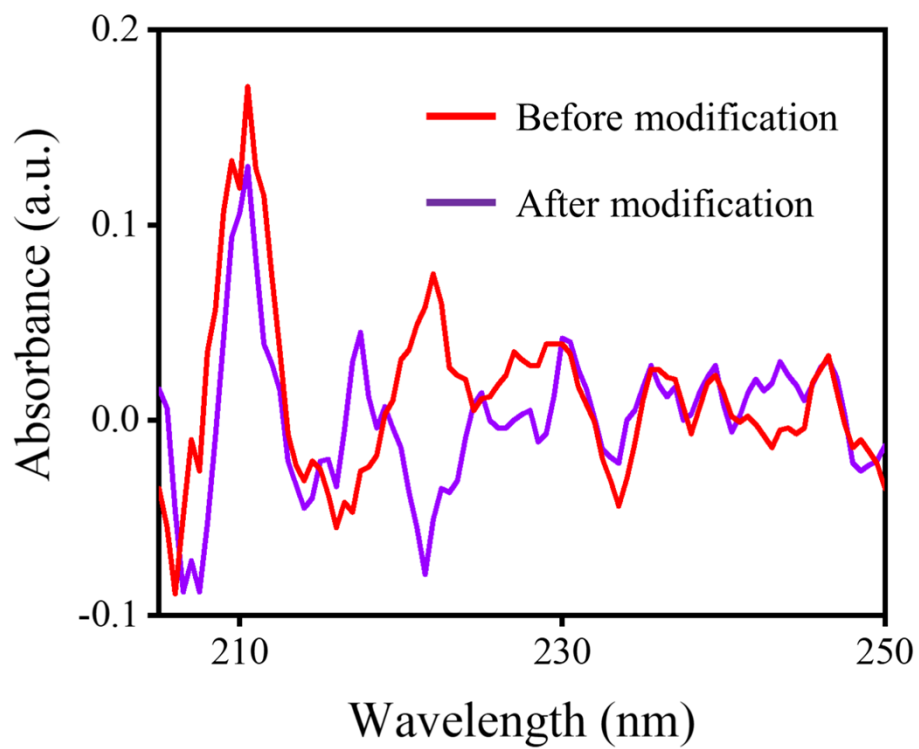

**Figure S10.** The UV absorbance at 200-250 nm of antibody solution before and after modification on the SAHMs.



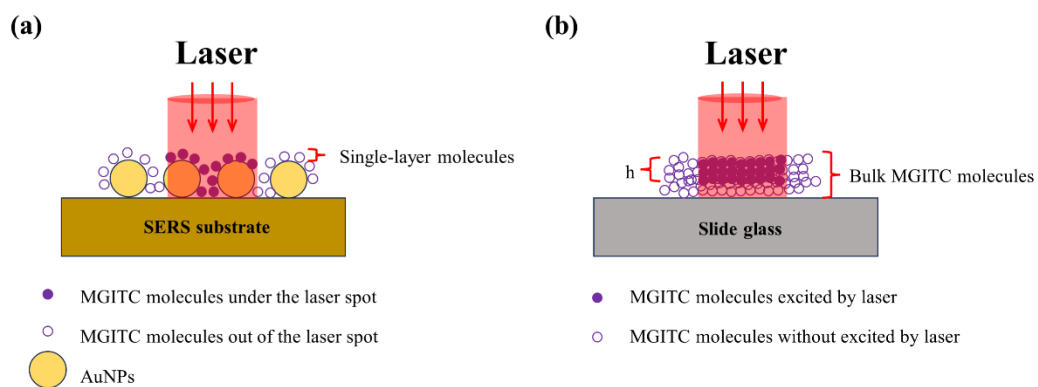

**Figure S11.** Schematic diagrams of  $N_{\text{SERS}}$  (a) and  $N_{\text{bulk}}$  (b).

**Table S1.** Vibrational assignments for the characteristic SERS peaks of DTDC, MGITC and HMPs (PEGDA).

| <b>DTDC Bands (cm<sup>-1</sup>)</b>  | <b>Assignment</b>                                                                             |
|--------------------------------------|-----------------------------------------------------------------------------------------------|
| 780                                  | stretching of central carbon chain                                                            |
| 847                                  | C-H out-of-plane vibrations                                                                   |
| 1133                                 | Raman skeletal optical mode A <sub>g</sub><br>vibrational modes of all- <i>trans</i> rotamers |
| 1153                                 | C-C stretch in conjugated C=C molecules                                                       |
| 1266                                 | =C-H in-plane deformation, unconjugated                                                       |
| 1438                                 | CH <sub>2</sub> bend                                                                          |
| 1464                                 | ring vibrations                                                                               |
| 1575                                 | C=C stretching                                                                                |
| <b>MGITC Bands (cm<sup>-1</sup>)</b> | <b>Assignment</b>                                                                             |
| 757                                  | NH <sub>2</sub> bending, torsion                                                              |
| 796                                  | C-H bending from benzene ring                                                                 |
| 916                                  | b <sub>1u</sub> in plane benzene ring                                                         |
| 1170                                 | v <sub>9</sub> benzene in plane                                                               |
| 1218                                 | N-C stretch + NR <sub>2</sub> bending                                                         |
| 1295                                 | In plane C-H and C-C-H                                                                        |
| 1363                                 | N-Phenyl ring stretching                                                                      |
| 1391                                 | In plane C-C and C-H                                                                          |
| 1586                                 | In plane ring, stretch + bending                                                              |
| 1614                                 | N-Phenyl ring + C-C stretching                                                                |
| <b>HMPs Bands (cm<sup>-1</sup>)</b>  | <b>Assignment</b>                                                                             |
| 858                                  | Alicyclic chain vibrations                                                                    |
| 1285                                 | =C-H in-plane deformation                                                                     |
| 1467                                 | O-CH <sub>2</sub> deformation                                                                 |
| 1635                                 | C=C stretching                                                                                |
| 1726                                 | stretching of C=O                                                                             |

**Table S2.** The description of all acronym presented in manuscript.

| <b>Acronym</b> | <b>Description</b>                    |
|----------------|---------------------------------------|
| HCC            | Hepatocellular carcinoma              |
| SERS           | Surface-enhanced Raman scattering     |
| SAHMs          | SERS-active hydrogel microparticles   |
| AuNPs          | gold nanoparticles                    |
| AFP            | alpha-fetoprotein                     |
| AFU            | alpha-l-fucosidase                    |
| FLISA          | Fluorescence immunosorbent assay      |
| NMNPs          | Noble metal nanoparticles             |
| F-NPs          | Ferro-nanoparticles                   |
| HMPs           | hydrogel microparticles               |
| AgNPs          | Silver nanoparticles                  |
| PDMS           | Polydimethylsiloxane                  |
| MGITC          | Malachite green isothiocyanate        |
| DTDC           | 3,3'-diethylthiadicarbocyanine iodide |
| PBS            | Phosphate-buffered saline             |
| McAb           | monoclonal antibody                   |
| BSA            | bovine serum albumin                  |
| PEGDA          | polyethylene glycol diacrylate        |
| SEM            | scanning electron microscope          |
| EF             | enhancement factor                    |
| TEM            | Transmission electron microscope      |
| LOD            | limit of detection                    |

**Table S3.** Comparison of the proposed method for AFP and AFU with other reported works.

| Analyst | Detection Method     | Amplification Strategy        | Detection Range                               | Detection Mode              | Selectivity                             | Operation Mode     | Reaction Time | Ref        |
|---------|----------------------|-------------------------------|-----------------------------------------------|-----------------------------|-----------------------------------------|--------------------|---------------|------------|
| AFP     | SERS                 | Ag@aUNCs/<br>MoS <sub>2</sub> | 1 pg mL <sup>-1</sup> -10 ng mL <sup>-1</sup> | Singlet                     | N/A                                     | Manual             | 2 h 5 min     | 3          |
|         | Electrochemical      | HAP NPs                       | 0.01-10 ng mL <sup>-1</sup>                   | Singlet                     | HSA, CEA, GSH, IgG                      | Manual             | 1 h 50 min    | 4          |
|         | Photoelectrochemical | CdS-QDs                       | 0.1-500 ng mL <sup>-1</sup>                   | Singlet                     | CEA, PSA, H <sub>2</sub> O <sub>2</sub> | Manual             | N/A           | 5          |
|         | Fluorescence         | QDs- AuNPs                    | 0.5-45 ng mL <sup>-1</sup>                    | Singlet                     | BSA, CEA, HAS, IgG                      | Automatic          | 1 h 20 min    | 6          |
|         | Photoelectrochemical | MoS <sub>2</sub> /Au/GaN      | 1.0-150 ng mL <sup>-1</sup>                   | Singlet                     | CEA, TB, BSA                            | Manual             | 54 min        | 7          |
|         | Magnetoresistance    | MBs                           | 100 fg mL <sup>-1</sup> μg mL <sup>-1</sup>   | Singlet                     | BSA, PSA                                | Automatic          | 5 h 30 min    | 8          |
|         | SERS-Microfluidics   | SAHMs/ AuNPs                  | 0.1-100 ng mL <sup>-1</sup>                   | Multiple                    | AFU, BSA, PSA, Thrombin                 | Automatic          | 1 h 40 min    | This work  |
| AFU     | Plasmonic            | AuNPs                         | 0.015-100 ng mL <sup>-1</sup>                 | Multiple                    | N/A                                     | Automatic          | N/A           | 9          |
|         | Fluorescence         | Carbon dots                   | 3.8-67 ng mL <sup>-1</sup>                    | Singlet                     | N/A                                     | Manual             | 1 h 20 min    | 10         |
|         | Fluorescence         | Polymer dots                  | 0.01-0.9 ng mL <sup>-1</sup>                  | Singlet                     | BSA, Leu, et al                         | Manual             | 20 min        | 11         |
|         | Quartz slide assay   | Quartz                        | N/A                                           | Singlet                     | BSA, HSA, IgG                           | Manual             | 2h 40 min     | 12         |
|         |                      | SERS-Microfluidics            | SAHMs/ AuNPs                                  | 0.01-10 ng mL <sup>-1</sup> | Multiple                                | AFP, AFU, BSA, PSA | Automatic     | 1 h 40 min |

## References

1. R. Gao, C. Zhan, C. Wu, Y. Lu, B. Cao, J. Huang, F. Wang and L. Yu, *Lab Chip*, 2021, DOI: 10.1039/d1lc00516b.
2. G. Ruiz, K. Tripathi, S. Okyem and J. D. Driskell, *Bioconjugate Chemistry*, 2019, **30**, 1182-1191.
3. E. Er, A. Sanchez-Iglesias, A. Silvestri, B. Arnaiz, L. M. Liz-Marzan, M. Prato and A. Criado, *ACS Appl Mater Interfaces*, 2021, **13**, 8823-8831.
4. J. Sun, D. Tian, Q. Guo, L. Zhang, W. Jiang and M. Yang, *Analytical Methods*, 2016, **8**, 7319-7323.
5. R. Xu, Y. Jiang, L. Xia, T. Zhang, L. Xu, S. Zhang, D. Liu and H. Song, *Biosens Bioelectron*, 2015, **74**, 411-417.
6. L. Zhou, F. Ji, T. Zhang, F. Wang, Y. Li, Z. Yu, X. Jin and B. Ruan, *Talanta*, 2019, **197**, 444-450.
7. D. Hu, H. Cui, X. Wang, F. Luo, B. Qiu, W. Cai, H. Huang, J. Wang and Z. Lin, *Anal Chem*, 2021, **93**, 7341-7347.
8. Y. Zhu, Q. Zhang, X. Li, H. Pan, J. Wang and Z. Zhao, *Sensors and Actuators B: Chemical*, 2019, **293**, 53-58.
9. X. Han, H. Shokri Kojori, R. M. Leblanc and S. J. Kim, *Anal Chem*, 2018, **90**, 7795-7799.
10. K. Mintz, E. Waidely, Y. Zhou, Z. Peng, A. O. Al-Youbi, A. S. Bashammakh, M. S. El-Shahawi and R. M. Leblanc, *Anal Chim Acta*, 2018, **1041**, 114-121.
11. X. Cheng, Y. Huang, D. Li, C. Yuan, Z.-L. Li, L. Sun, H. Jiang and J. Ma, *Sensors and Actuators B: Chemical*, 2019, **288**, 38-43.
12. E. Waidely, A. O. Al-Youbi, A. S. Bashammakh, M. S. El-Shahawi and R. M. Leblanc, *Anal Chem*, 2017, **89**, 9459-9466.
